# Supplementary material for: Adipose tissue-derived mesenchymal stromal cells for treating chronic kidney disease: A pilot study assessing safety and clinical feasibility
Source: PubMed Central journal article supplement — Kidney Res Clin Pract. 2019 Jun 30;38(2):176–85. doi: 10.23876/j.krcp.18.0139 (PMC6577210; doi:10.23876/j.krcp.18.0139), 2019-06-30
Supplement: krcp-38-176_Supple.pdf [file krcp-38-176_Supple.pdf]

**Supplementary Table 1. Proteinuria, eGFR, and serum creatinine 12 months before and 12 months after infusion**

| Patient | Proteinuria (g/d) |             |        | eGFR (mL/min/1.73 m <sup>2</sup> ) |             |        | Serum creatinine (mg/dL) |             |        |
|---------|-------------------|-------------|--------|------------------------------------|-------------|--------|--------------------------|-------------|--------|
|         | -12 mo            | At infusion | +12 mo | -12 mo                             | At infusion | +12 mo | -12 mo                   | At infusion | +12 mo |
| 1       | 5.84              | 9.57        | 2.66   | 35.7                               | 25.3        | 12.9   | 2.45                     | 3.30        | 5.86   |
| 2       | 0.38              | 0.15        | 0.01   | 26.5                               | 33.2        | 28.6   | 2.66                     | 2.18        | 2.47   |
| 3       | 0.29              | 0.45        | 0.11   | 31.2                               | 33.4        | 30.9   | 1.95                     | 1.83        | 1.94   |
| 4       | 0.19              | 0.58        | 0.65   | 42.1                               | 38.2        | 39.3   | 1.37                     | 1.49        | 1.45   |
| 5       | 0.80              | 0.98        | 0.70   | 31.1                               | 31.6        | 27.9   | 2.46                     | 2.42        | 2.68   |
| 6       | 1.01              | 0.91        | 0.42   | 30.7                               | 29.0        | 25.4   | 1.98                     | 2.07        | 2.30   |

eGFR, estimated glomerular filtration rate.
